# Supplementary material for: Controlling nanoparticle-induced endothelial leakiness with the protein corona
Source: Royal Society of Chemistry journal article supplement (doi:10.1039/d4nr01311e), 2024-01-01
Supplement: d4nr01311e1.pdf [file d4nr01311e1.pdf]

## Electronic Supplementary Information (ESI)

# Controlling Nanoparticle-Induced Endothelial Leakiness with The Protein Corona

*Aparna Nandakumar,<sup>a</sup> Huayuan Tang,<sup>b,c</sup> Nicholas Andrikopoulos,<sup>a,d</sup> John F. Quinn,<sup>a</sup> Feng  
Ding,<sup>\*c</sup> Pu Chun Ke<sup>\*a,d</sup> and Yuhuan Li<sup>\*a,e</sup>*

<sup>a</sup> Drug Delivery, Disposition and Dynamics, Monash Institute of Pharmaceutical Sciences,  
Monash University, 381 Royal Parade, Parkville, VIC 3052, Australia

<sup>b</sup> Department of Engineering Mechanics, Hohai University, Nanjing 211100, China

<sup>c</sup> Department of Physics and Astronomy, Clemson University, Clemson, SC 29634, United  
States

<sup>d</sup> Nanomedicine Centre, The Great Bay Area National Institute for Nanotechnology  
Innovation, 136 Kaiyuan Avenue, Guangzhou, 510700, China

<sup>e</sup> Liver Cancer Institute, Zhongshan Hospital, Key Laboratory of Carcinogenesis and Cancer  
Invasion, Ministry of Education, Fudan University, Shanghai, 200032, China

### Corresponding Authors

Feng Ding, [fding@clemson.edu](mailto:fding@clemson.edu); Pu Chun Ke, [pu-chun.ke@monash.edu](mailto:pu-chun.ke@monash.edu); Yuhuan Li,  
[li.yuhuan1@zs-hospital.sh.cn](mailto:li.yuhuan1@zs-hospital.sh.cn)

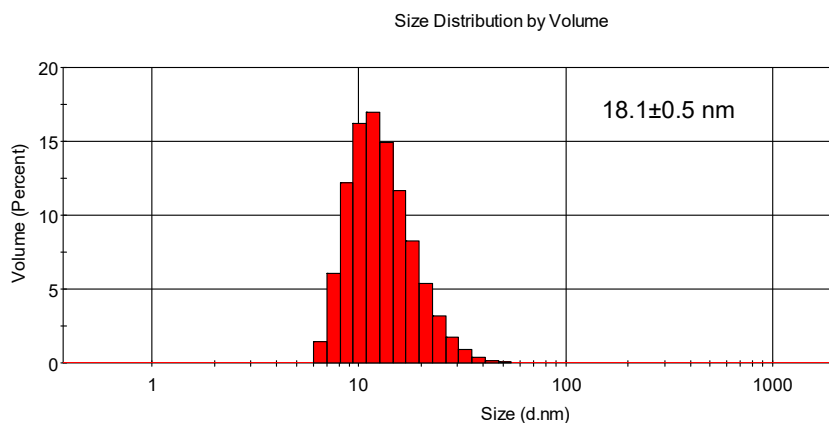

**Figure S1.** Hydrodynamic size of citrate-capped AuNPs.

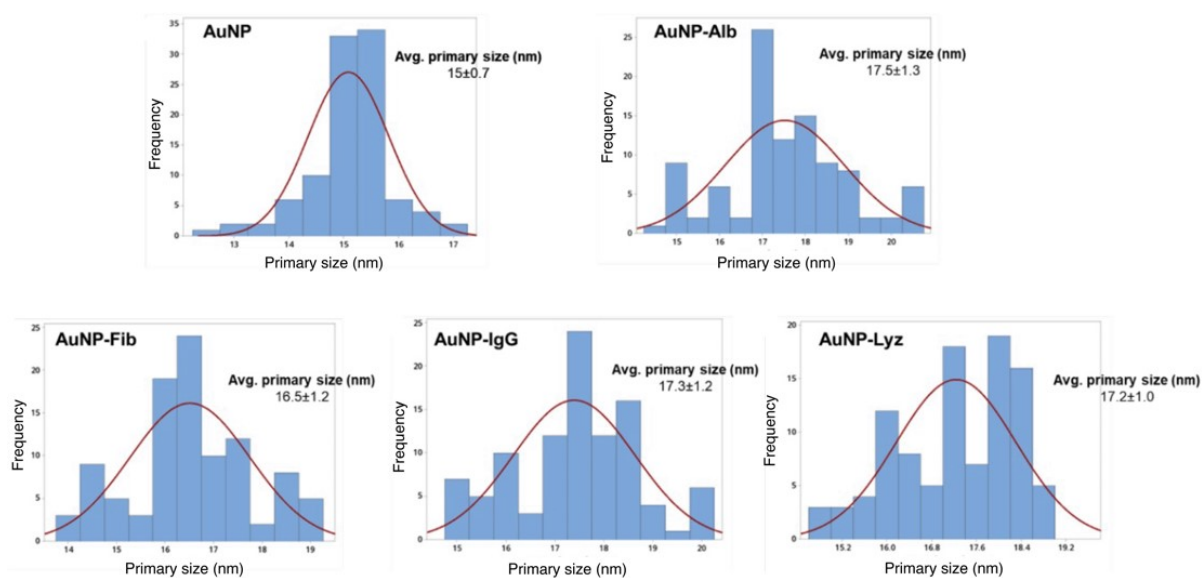

**Figure S2.** Primary size distributions of the AuNPs and their corresponding protein coronas. A total of 50 individual particles from TEM images were analyzed using ImageJ and the histogram was mapped in Minitab statistical package.

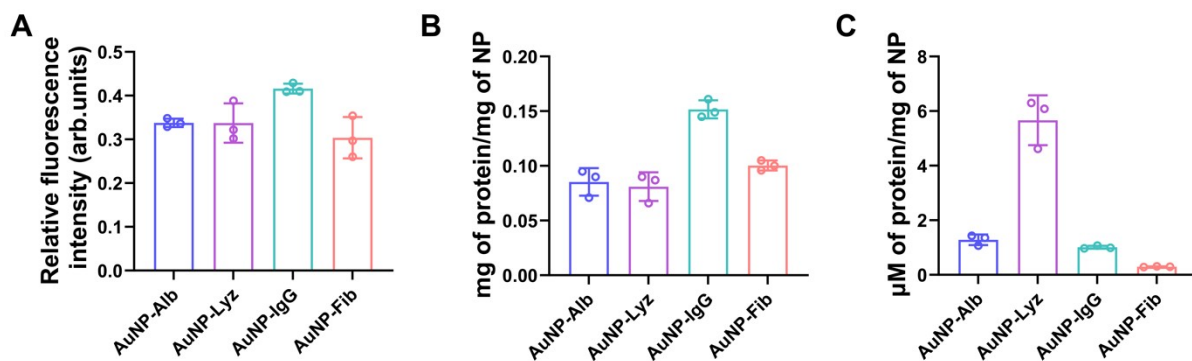

**Figure S3.** (A) Absorbance measurement at 562 nm for different AuNP/protein coronas. The mass (B) and molar amount (C) of the proteins bound to AuNPs (1 mg) were determined from the BCA protein assay interpolating the BSA standards.

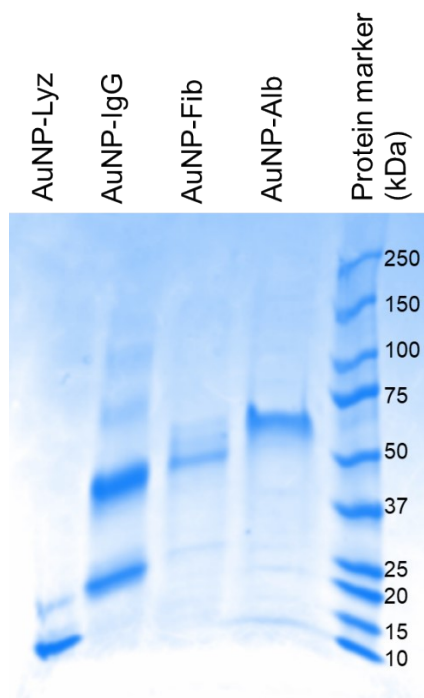

**Figure S4.** SDS-PAGE confirmed the presence of coronal proteins for the fixed mass ratio of 1:5 AuNP/protein used for the cell culture experiments.

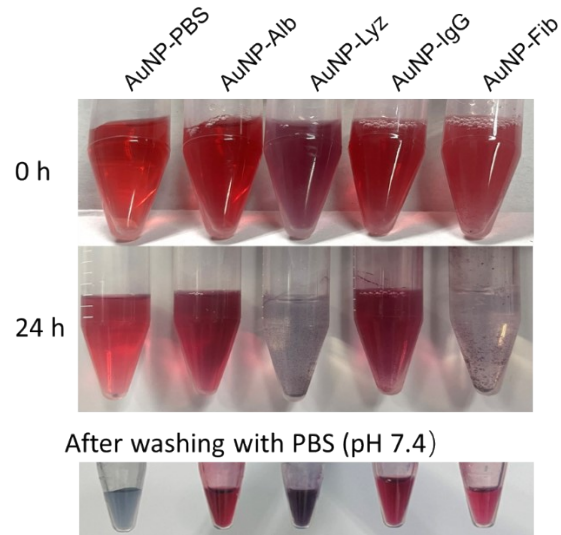

**Figure S5.** Mixtures of the AuNPs and the four types of plasma proteins at 0 h and 24 h incubation under constant shaking at 37 °C.

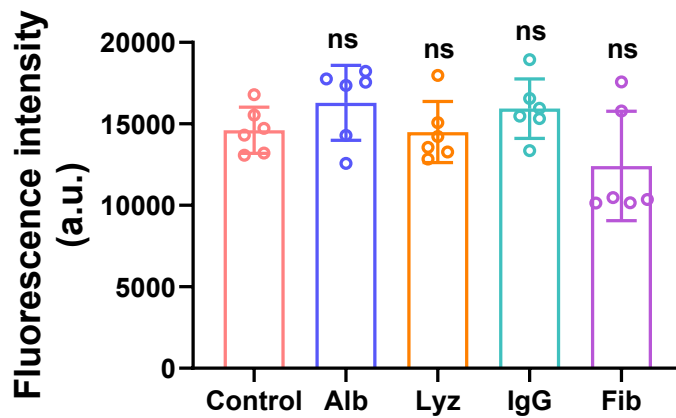

**Figure S6.** Transwell assay revealed no leakiness in the HUVEC monolayers due to the introduction of the plasma proteins alone.

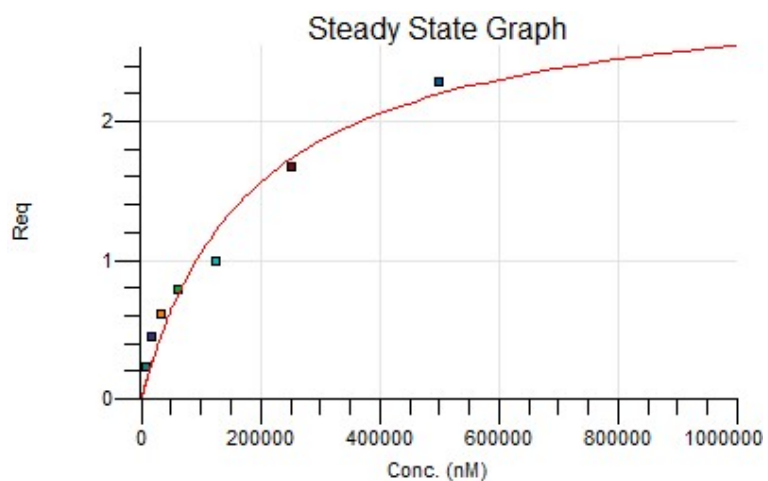

**Figure S7.** Steady-state graph of different concentrations of Lyz interacting with VE-cadherin coated on NTA sensors examined with the BLI assay.

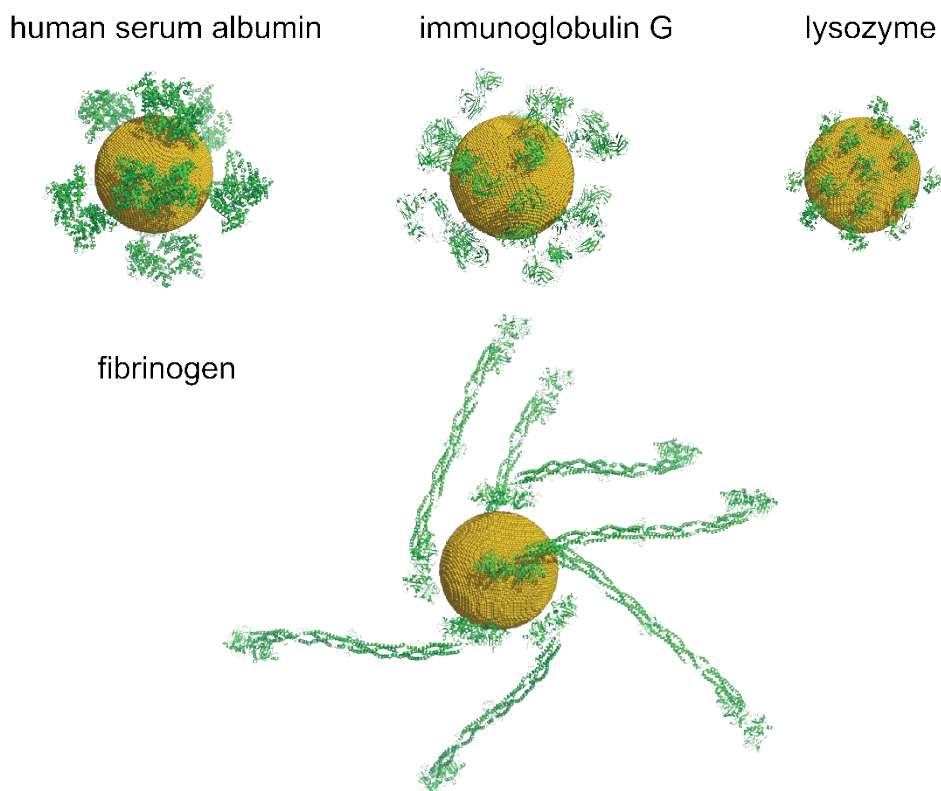

**Figure S8.** Schematic illustration of the binding of multiple proteins with AuNPs.

**Table S1. Amino acid sequence, PDB structure and net charge of the plasma proteins used in binding analysis.**

| Protein | Molecular weight (kDa) | Sequence from UniProt                                                                                                        | PDB for docking | Net charge |
|---------|------------------------|------------------------------------------------------------------------------------------------------------------------------|-----------------|------------|
| Alb     | 66.5                   | P02768                                                                                                                       | 1AO6.pdb        | -11        |
| Fib     | 340                    | Alpha chain: P02671<br>Beta chain: P02675<br>Gamma chain: P02679                                                             | 3GHG.pdb        | -10        |
| IgG     | 150                    | Immunoglobulin heavy constant gamma 2: P01859<br>Immunoglobulin heavy variable: P01814<br>Immunoglobulin light chain: P0DOX8 | 1HZH.pdb        | 0          |
| Lyz     | 14.3                   | P61626                                                                                                                       | 1REX.pdb        | +9         |

**Table S2. Physicochemical characteristics of the AuNP-protein coronas.**

| Sample   | Peak absorbance (nm) |      | Primary size (nm) | $\zeta$ – potential (mV) |           |
|----------|----------------------|------|-------------------|--------------------------|-----------|
|          | 0 h                  | 24 h |                   | W/o wash                 | With wash |
| AuNP     | 519                  | 524  | 15.0±0.7          | -28.3±0.2                | -27.3±1.6 |
| AuNP-Alb | 527                  | 551  | 17.5±1.3          | -0.6±0.3                 | -10.2±0.5 |
| AuNP-Fib | 541                  | 542  | 16.5±1.2          | -6.6±0.4                 | -8.6±0.9  |
| AuNP-IgG | 527                  | 535  | 17.3±1.2          | -4.0±0.5                 | -6.7±0.7  |
| AuNP-Lyz | 558                  | 570  | 17.2±1.0          | 3.0±0.4                  | -6.7±0.7  |
